# Supplementary material for: TNF-αInduced the Enhanced Apoptosis of Mesenchymal Stem Cells in Ankylosing Spondylitis by Overexpressing TRAIL-R2
Source: Hindawi journal article supplement (doi:10.1155/2017/4521324), 2017-01-01
Supplement: f1 [file 4521324.f1.pdf]

**Supplement Table 1. Characteristics of the study subjects**

|                          | Healthy donors | AS patients  |
|--------------------------|----------------|--------------|
| Number                   | 28             | 22           |
| Age (year)               | 30.2±10.1      | 34.8±12.8    |
| Male no.(%)              | 18 (64.3%)     | 15 (68.2%)   |
| HLA-B27 positive no.(%)  | 0              | 21 (95.5%) * |
| Disease duration (year)  | NA             | 7.02±6.2     |
| CRP (mg/L)               | 3.1±1.3        | 18.6±13.2*   |
| ESR (mm/h)               | 10.1±3.3       | 27.5±14.9*   |
| BASDAI                   | 0.95±0.86      | 4.69±1.01*   |
| <b>Treatment options</b> |                |              |
| NSAIDs                   | 0              | 10           |
| TNF- $\alpha$ inhibitor  | 0              | 7            |
| NSAIDs+DMARDs            | 0              | 5            |

Mean±SD. AS, ankylosing spondylitis; HLA-B27, human leukocyte antigen B27; CRP, C-reactive protein; ESR, erythrocyte sedimentation rate; BASDAI, the bath ankylosing spondylitis disease activity index; \* indicates P< 0.05 compared to healthy donors.
